# Supplementary material for: Microarray-assisted size-effect study of amorphous silica nanoparticles on human bronchial epithelial cells
Source: Royal Society of Chemistry journal article supplement (doi:10.1039/c9nr07350g), 2019-01-01
Supplement: c9nr07350g1.pdf [file c9nr07350g1.pdf]

## **Supplementary material**

### **Microarray assisted size effect study of amorphous silica nanoparticles on human bronchial epithelial cells**

Yang Li <sup>a,b,#</sup>, Junchao Duan <sup>a,b,#</sup>, Xiangyuan Chai <sup>c</sup>, Man Yang <sup>a,b</sup>, Ji wang <sup>a,b</sup>, Rui Chen <sup>a,b,\*</sup>, Zhiwei Sun <sup>a,b,\*</sup>

<sup>a</sup> School of Public Health, , Beijing 100069, China

<sup>b</sup> Beijing Key Laboratory of Environmental Toxicology, Capital Medical University, Beijing 100069, China

<sup>c</sup> Xuanwu Hospital, Capital Medical University, Beijing, 100053, China

\* Corresponding author. Zhiwei Sun, E-mail: [zwsun@ccmu.edu.cn](mailto:zwsun@ccmu.edu.cn); Rui Chen, E-mail: [ruichen@ccmu.edu.cn](mailto:ruichen@ccmu.edu.cn)

# Authors contributed equally

**Table S1 MPPD baseline settings**

| <b>MPPD baseline input categories</b>                                     | <b>Baseline input settings</b>                                                                                                                                                                                                                                                                                                                                              |
|---------------------------------------------------------------------------|-----------------------------------------------------------------------------------------------------------------------------------------------------------------------------------------------------------------------------------------------------------------------------------------------------------------------------------------------------------------------------|
| Individual characteristics (airway morphometry and deposition/ clearance) | Human species; Yeh-Schum symmetric single path lung model; FRC = 2950 mL; URT volume = 50 mL; Tracheal mucous velocity = 5.5 mm/ min; fast human clearance rate = 0.02/day; medium human clearance rate = 0.001/ day; slow human clearance rate = 0.0001/day; lymph node human clearance rate = 0.00002/day                                                                 |
| Exposure scenario: constant exposure                                      | Acceleration of gravity = 981.0 cm/sec <sup>2</sup> ; body orientation = upright; aerosol concentration = 11 mg/m <sup>3</sup> ; breathing frequency = 20/min; VT= 700 mL; inspiratory fraction = 0.5; pause fraction = 0; breathing scenario, nasal breather; number of hours per day = 8; number of days per week = 1; number of weeks = 1; maximum postexposure days = 0 |
| Particle properties                                                       | Density = 2.2 g/cm <sup>3</sup> ; diameter = 0.041 or 0.061 or 0.206 µm; count median diameter checked; Nanoparticles model not checked; inhalability adjustment not checked; GSD (diameter) = 1.135                                                                                                                                                                        |

Abbreviations: FRC, functional residual capacity; VT, tidal volume; GSD, geometric standard deviation
